# Supplementary material
Source: publisher figshare collection journal article supplement (https://acs.figshare.com/ndownloader/files/4764184)
Supplement: Supplementary file 1 [file 4764184]

## **--Supporting Information--**

### **Pairwise coupling analysis of tertiary structural hydrogen bonding interactions in luteoviral RNA pseudoknots**

Peter V. Cornish and David P. Giedroc\*

*Department of Biochemistry and Biophysics, 2128 TAMU, Texas A&M University*

*College Station, TX 77843-2128*

**TABLE S1:** Melting transition temperatures ( $t_{m,i}$ ) and thermodynamic parameters ( $\Delta G_i$  and  $\Delta H_i$ ) for the folding of the wild-type ScYLV RNA pseudoknot acquired over a range of pH values. The resolved parameters reflect the mean and standard error derived from 3-5 replicate melting profiles as described in Materials and Methods. A two-transition unfolding model was used to fit individual melting profiles was applied (see Scheme 1) with the derived parameters shown only for transition 1 ( $I$ ). See Fig. 3, panels A, C, E for deconvolutions of representative melting profiles.

**TABLE S2:** Melting transition temperatures ( $t_{m,i}$ ) and thermodynamic parameters ( $\Delta G_i$  and  $\Delta H_i$ ) for the folding of the dC14 ScYLV RNA pseudoknot acquired over a range of pH values. The resolved parameters reflect the mean and standard error derived from at least three replicate melting profiles. A three-transition fit was judged satisfactory to fit these melting profiles over the entire pH range (see Scheme 2). Derived parameters are shown for transitions 1 and 2 only. See Fig. 3, panels B, D, F for representative melting profile deconvolutions.

**TABLE S3.** Melting transition temperatures ( $t_{m,i}$ ) and thermodynamic parameters ( $\Delta G_i$  and  $\Delta H_i$ ) for the folding of the C27A ScYLV RNA pseudoknot acquired over a range of pH values. The resolved parameters reflect the mean and standard error derived from 3-5 replicate melting profiles. A two transition unfolding model was used to fit individual melting profiles (*I*). See Fig. 4, panels A, C, E for deconvolutions of representative melting profiles.

**TABLE S4.** Melting transition temperatures ( $t_{m,i}$ ) and thermodynamic parameters ( $\Delta G_i$  and  $\Delta H_i$ ) for the folding of the dC14/C27A ScYLV RNA pseudoknot acquired over a range of pH values. The resolved parameters reflect the mean and standard error derived from at least three replicate melting profiles as described in Materials and Methods. A three-transition fit was judged satisfactory to fit these melting profiles from pH 5.0 to 7.0 (see Scheme 2), with the first unfolding transition apparently lost at higher pH ( $>7.0$ ;  $\Delta H_1 \leq 5 \text{ kcal mol}^{-1}$ , a lower limit of detection) and was therefore fit to Scheme 1. See Fig. 4, panels B, D, F for deconvolutions of representative melting profiles.

**TABLE S1:** WT ScYLV thermodynamic parameters

| pH  | $t_{m1}$ (°C) | $\Delta H_1$<br>(kcal mol <sup>-1</sup> ) | $\Delta G_1$<br>(kcal mol <sup>-1</sup> ) |
|-----|---------------|-------------------------------------------|-------------------------------------------|
| 5.0 | 77.5 ± 0.3    | -55.2 ± 0.6                               | -6.4 ± 0.1                                |
| 5.5 | 77.9 ± 0.3    | -55.2 ± 0.7                               | -6.5 ± 0.1                                |
| 6.0 | 76.4 ± 0.4    | -56.9 ± 0.7                               | -6.4 ± 0.1                                |
| 6.5 | 75.5 ± 0.6    | -55.8 ± 1.4                               | -6.2 ± 0.1                                |
| 7.0 | 72.6 ± 0.7    | -55.3 ± 0.8                               | -5.7 ± 0.1                                |
| 7.5 | 71.1 ± 0.3    | -51.1 ± 0.3                               | -5.1 ± 0.1                                |
| 8.0 | 67.4 ± 0.3    | -46.5 ± 1.0                               | -4.2 ± 0.1                                |
| 8.5 | 64.6 ± 0.4    | -45.1 ± 0.4                               | -3.7 ± 0.1                                |
| 9.0 | 64.6 ± 0.3    | -44.0 ± 0.5                               | -3.6 ± 0.1                                |

**TABLE S2:** dC14 ScYLV thermodynamic parameters

| pH  | $t_{m1}$ (°C) | $\Delta H_1$<br>(kcal mol <sup>-1</sup> ) | $\Delta G_1$<br>(kcal mol <sup>-1</sup> ) | $t_{m2}$ (°C) | $\Delta H_2$<br>(kcal mol <sup>-1</sup> ) | $\Delta G_2$<br>(kcal mol <sup>-1</sup> ) |
|-----|---------------|-------------------------------------------|-------------------------------------------|---------------|-------------------------------------------|-------------------------------------------|
| 5.0 | 58.2 ± 0.4    | -33.4 ± 0.7                               | -2.2 ± 0.1                                | 67.6 ± 0.5    | -43.1 ± 0.5                               | -3.9 ± 0.1                                |
| 5.5 | 58.5 ± 0.1    | -31.7 ± 0.3                               | -2.1 ± 0.1                                | 68.3 ± 0.1    | -43.1 ± 0.1                               | -4.0 ± 0.1                                |
| 6.0 | 57.0 ± 0.1    | -29.2 ± 1.4                               | -1.8 ± 0.1                                | 65.3 ± 0.4    | -45.3 ± 0.4                               | -3.8 ± 0.1                                |
| 6.5 | 56.3 ± 0.6    | -31.0 ± 1.8                               | -1.8 ± 0.2                                | 65.4 ± 0.8    | -42.1 ± 0.5                               | -3.6 ± 0.1                                |
| 7.0 | 55.7 ± 0.3    | -31.9 ± 1.3                               | -1.8 ± 0.1                                | 64.0 ± 0.6    | -40.7 ± 1.6                               | -3.3 ± 0.1                                |
| 7.5 | 53.8 ± 1.3    | -35.9 ± 3.5                               | -1.9 ± 0.2                                | 61.9 ± 0.4    | -36.1 ± 1.3                               | -2.7 ± 0.1                                |
| 8.0 | 53.6 ± 0.4    | -32.3 ± 2.0                               | -1.7 ± 0.1                                | 61.8 ± 1.9    | -29.1 ± 3.3                               | -2.2 ± 0.1                                |
| 8.5 | 50.6 ± 0.3    | -35.1 ± 0.4                               | -1.5 ± 0.1                                | 62.6 ± 0.7    | -30.7 ± 2.9                               | -2.4 ± 0.3                                |
| 9.0 | 47.8 ± 0.3    | -34.1 ± 0.8                               | -1.2 ± 0.1                                | 61.7 ± 0.6    | -32.4 ± 1.5                               | -2.4 ± 0.1                                |

**TABLE S3:** C27A ScYLV thermodynamic parameters

| pH  | $t_{m1}$ (°C) | $\Delta H_1$<br>(kcal mol <sup>-1</sup> ) | $\Delta G_1$<br>(kcal mol <sup>-1</sup> ) |
|-----|---------------|-------------------------------------------|-------------------------------------------|
| 5.0 | 73.0 ± 0.5    | -60.2 ± 1.0                               | -6.3 ± 0.1                                |
| 5.5 | 73.0 ± 0.3    | -58.2 ± 0.2                               | -6.1 ± 0.1                                |
| 6.0 | 71.6 ± 0.5    | -54.7 ± 0.4                               | -5.5 ± 0.1                                |
| 6.5 | 70.1 ± 0.3    | -56.6 ± 1.0                               | -5.5 ± 0.1                                |
| 7.0 | 69.3 ± 0.9    | -43.3 ± 1.8                               | -4.1 ± 0.1                                |
| 7.5 | 66.0 ± 0.2    | -46.6 ± 1.2                               | -4.0 ± 0.1                                |
| 8.0 | 62.9 ± 0.3    | -41.4 ± 1.2                               | -3.2 ± 0.1                                |
| 8.5 | 60.7 ± 0.4    | -39.6 ± 0.8                               | -2.8 ± 0.1                                |
| 9.0 | 60.2 ± 0.9    | -32.9 ± 1.1                               | -2.3 ± 0.1                                |

**Table S4:** dC14/C27A ScYLV thermodynamic parameters

| pH  | dC14/C27A ScYLV |                                           |                                           |               |                                           |                                           |
|-----|-----------------|-------------------------------------------|-------------------------------------------|---------------|-------------------------------------------|-------------------------------------------|
|     | $t_{m1}$ (°C)   | $\Delta H_1$<br>(kcal mol <sup>-1</sup> ) | $\Delta G_1$<br>(kcal mol <sup>-1</sup> ) | $t_{m2}$ (°C) | $\Delta H_2$<br>(kcal mol <sup>-1</sup> ) | $\Delta G_2$<br>(kcal mol <sup>-1</sup> ) |
| 5.0 | 56.0 ± 0.1      | -29.5 ± 2.8                               | -1.7 ± 0.2                                | 68.2 ± 2.6    | -43.5 ± 5.0                               | -4.0 ± 0.8                                |
| 5.5 | 56.0 ± 0.1      | -35.4 ± 4.2                               | -2.1 ± 0.2                                | 69.3 ± 1.1    | -48.0 ± 1.7                               | -4.6 ± 0.2                                |
| 6.0 | 55.0 ± 0.1      | -27.9 ± 2.7                               | -1.5 ± 0.2                                | 68.4 ± 0.5    | -41.9 ± 3.2                               | -3.9 ± 0.3                                |
| 6.5 | 54.0 ± 0.1      | -32.8 ± 4.1                               | -1.7 ± 0.2                                | 66.9 ± 0.1    | -44.7 ± 1.8                               | -4.0 ± 0.1                                |
| 7.0 | 53.3 ± 1.2      | -31.7 ± 1.6                               | -1.6 ± 0.2                                | 64.9 ± 0.2    | -40.6 ± 5.3                               | -3.4 ± 0.4                                |
| 7.5 | —               | —                                         | —                                         | 62.8 ± 0.4    | -38.0 ± 1.0                               | -2.9 ± 0.1                                |
| 8.0 | —               | —                                         | —                                         | 59.6 ± 0.2    | -36.9 ± 1.0                               | -2.5 ± 0.1                                |
| 8.5 | —               | —                                         | —                                         | 58.1 ± 0.3    | -34.7 ± 1.9                               | -2.2 ± 0.1                                |
| 9.0 | —               | —                                         | —                                         | 56.5 ± 0.9    | -34.4 ± 3.2                               | -2.0 ± 0.1                                |

**References:**

1. Cornish, P. V., Hennig, M., and Giedroc, D. P. (2005) A loop 2 cytidine-stem 1 minor groove interaction as a positive determinant for pseudoknot-stimulated -1 ribosomal frameshifting. *Proc Natl Acad Sci U S A* 102, 12694-12699.
